# Supplementary material for: Human T-bet+ B cell development is associated with BTK activity and suppressed by evobrutinib
Source: JCI journal article supplement (doi:10.1172/jci.insight.160909), 2022-07-19
Supplement: sd1 [file 1]

**Supplementary Table 1: Patient characteristics**

| <b>Ex vivo</b>              | <b>N</b> | <b>Age</b><br>(mean[ <i>min-max</i> ]) | <b>Gender</b><br>(% <i>females</i> ) |
|-----------------------------|----------|----------------------------------------|--------------------------------------|
| <b>HC</b>                   | 30       | 42 [20-73]                             | 60                                   |
| <b>CIS</b>                  | 29       | 33 [19-50]                             | 72.4                                 |
| <b>RRMS</b>                 | 30       | 43 [19-80]                             | 70                                   |
| <b>SPMS</b>                 | 15       | 55 [37-68]                             | 53.3                                 |
| <b>PPMS</b>                 | 15       | 55 [38-72]                             | 60                                   |
| <b>NTZ-MS</b>               | 15       | 35 [17-52]                             | 80                                   |
| <i>NTZ - responders</i>     | 10       | 34 [17-49]                             | 70                                   |
| <i>NTZ - non-responders</i> | 5        | 37 [18-52]                             | 100                                  |

*HC, healthy control; CIS, clinically isolated syndrome; RRMS, relapsing-remitting MS; SPMS, secondary progressive MS; PPMS, primary progressive MS, NTZ-MS, natalizumab-treated MS*

**Supplementary Table 2: Monoclonal anti-human antibodies used for FACS.**

| <b>Marker</b>           | <b>Label</b>                 | <b>Clone</b> | <b>Supplier</b>               |
|-------------------------|------------------------------|--------------|-------------------------------|
| BTK                     | PE                           | 53/BTK       | BD Biosciences <sup>A</sup>   |
| CD3                     | AF700                        | SK7          | Biolegend <sup>B</sup>        |
| CD3                     | APC                          | SK7          | BD Biosciences                |
| CD11c                   | BV605                        | B-ly6        | BD Biosciences                |
| CD19                    | BV786                        | HIB19        | Biolegend                     |
| CD21                    | BV711                        | B-Ly-4       | BD Biosciences                |
| CD27                    | BV421                        | M-T271       | BD Biosciences                |
| CD38                    | BV605, PE-Cy7 or PerCP-Cy5.5 | HIT2         | Biolegend                     |
| CXCR3                   | PE-Cy7                       | G025H7       | Biolegend                     |
| CXCR4                   | APC or PE-CF594              | 12G5         | BD Biosciences                |
| CXCR5                   | PerCP-Cy5.5                  | RF8B2        | BD Biosciences                |
| Fixable viability stain | AF700                        |              | BD Biosciences                |
| IgD                     | PE-CF594                     | IA6-2        | BD Biosciences                |
| IgG                     | APC-H7                       | G18-145      | BD Biosciences                |
| IgG1                    | PE                           | HP6001       | Southern Biotech <sup>C</sup> |
| IgG2                    | AF488                        | HP6002       | Southern Biotech              |
| IgM                     | BV510                        | MHM-88       | Biolegend                     |
| pBTK                    | PE                           | pY223        | BD Biosciences                |
| T-bet                   | PE-Cy7                       | 4B10         | Biolegend                     |
| VLA-4                   | BB515 or BV711               | 9F10         | BD Biosciences                |

<sup>A</sup> BD Biosciences, Erembodegem, Belgium

<sup>B</sup> Biolegend, London, UK

<sup>C</sup> Southern Biotech via ITK Diagnostics, Uithoorn, The Netherlands

Supplementary Figure 1

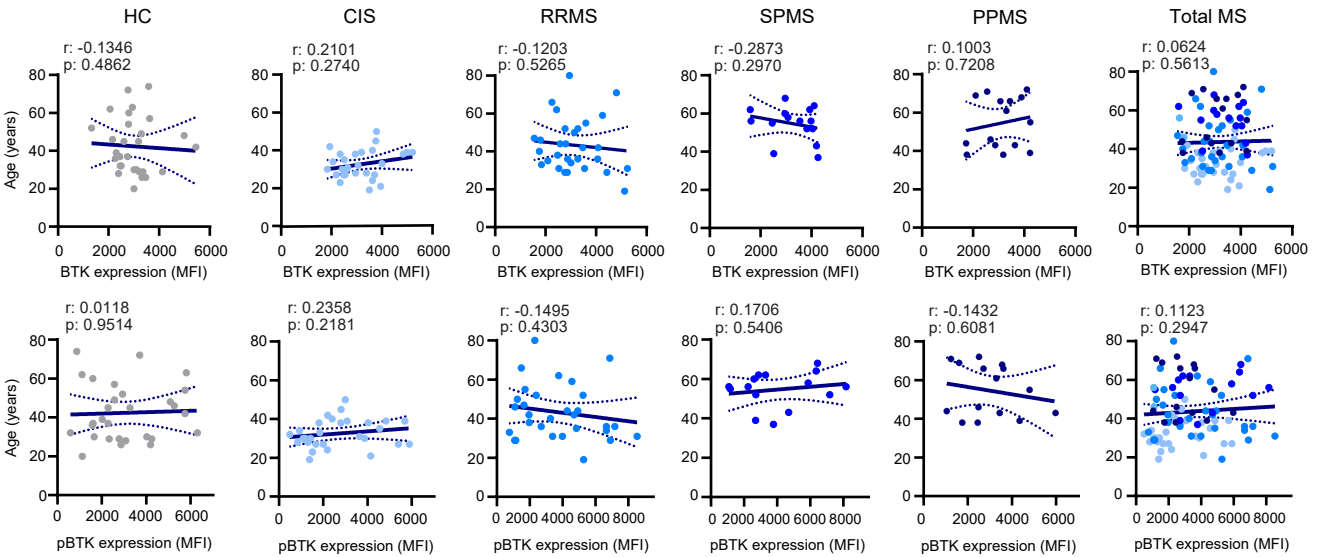

Supplementary Figure 1. No association between age and BTK and activity in B cells of MS patients and healthy individuals.

Correlation of age with BTK protein and phospho-BTK levels in circulating B cells of healthy control (HC; n=30), clinically isolated (CIS; n=29), relapsing-remitting MS (RRMS; n=30) secondary progressive MS (SPMS; n=15) and primary progressive MS (PPMS; n=15) patient groups as well as all MS patients together (total MS; n=89). Data were collected from the same number of experiments as depicted in Figure 1. Spearman correlations were performed.

Supplementary Figure 2

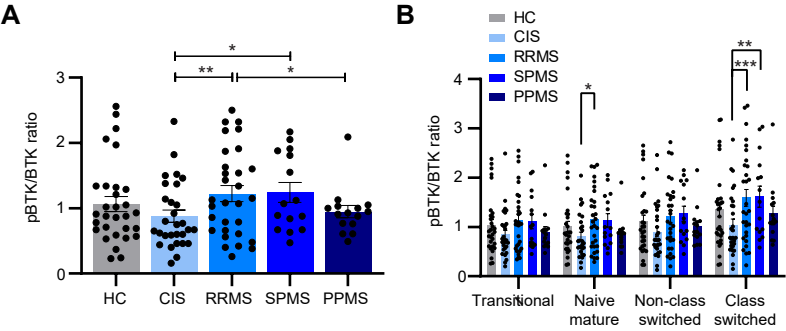

**Supplementary Figure 2. pBTK/BTK ratio is increased in B cells of RRMS and SPMS patients.** Phospho-BTK/BTK ratios in **(A)** total B cells as well as **(B)** transitional ( $CD38^{high}CD27^{-}$ ), naive mature ( $CD38^{dim/-}IgM^{+}CD27^{-}$ ), non-class switched ( $CD38^{dim/-}IgM^{+}CD27^{+}$ ) and class-switched ( $CD38^{dim/-}IgM^{+}IgD^{-}$ ) B-cell subsets within the blood of healthy control (HC; n=30), clinically isolated (CIS; n=29), relapsing-remitting MS (RRMS; n=30) secondary progressive MS (SPMS; n=15) and primary progressive MS (PPMS; n=15) patient groups. Data were collected from the same number of experiments as depicted in Figure 1. Data are presented as the mean  $\pm$  SEM. 2-way ANOVA with Fisher's LSD post-hoc test was performed. \*\*\*p < 0.001, \*\*p < 0.01 and \*p < 0.05.

Supplementary Figure 3

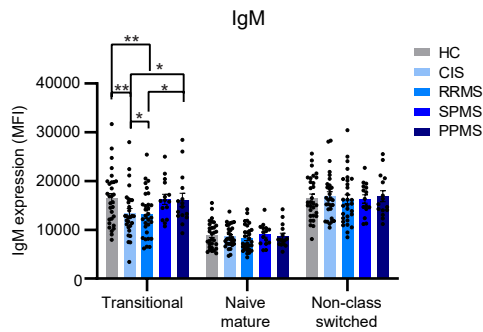

**Supplementary Figure 3. IgM expression in *ex vivo* blood B-cell subsets of different MS patients and healthy controls.** IgM expression levels (MFI) in transitional (CD38<sup>high</sup>CD27<sup>-</sup>), naive mature (IgM<sup>+</sup>CD27<sup>-</sup>) and non-class switched (IgM<sup>+</sup>CD27<sup>+</sup>) B-cell subsets within the blood of healthy controls (HC; n=30) and different MS patient groups, i.e. clinically isolated syndrome (CIS; n=29), relapsing-remitting MS (RRMS; n=30), secondary progressive MS (SPMS; n=15) and primary progressive MS (PPMS; n=15). Data were collected from the same number of experiments as depicted in Figure 1. Data are presented as the mean ± SEM. 2-way ANOVA with Fisher's LSD post-hoc test was performed. \*\*p < 0.01 and \*p < 0.05.

Supplementary Figure 4

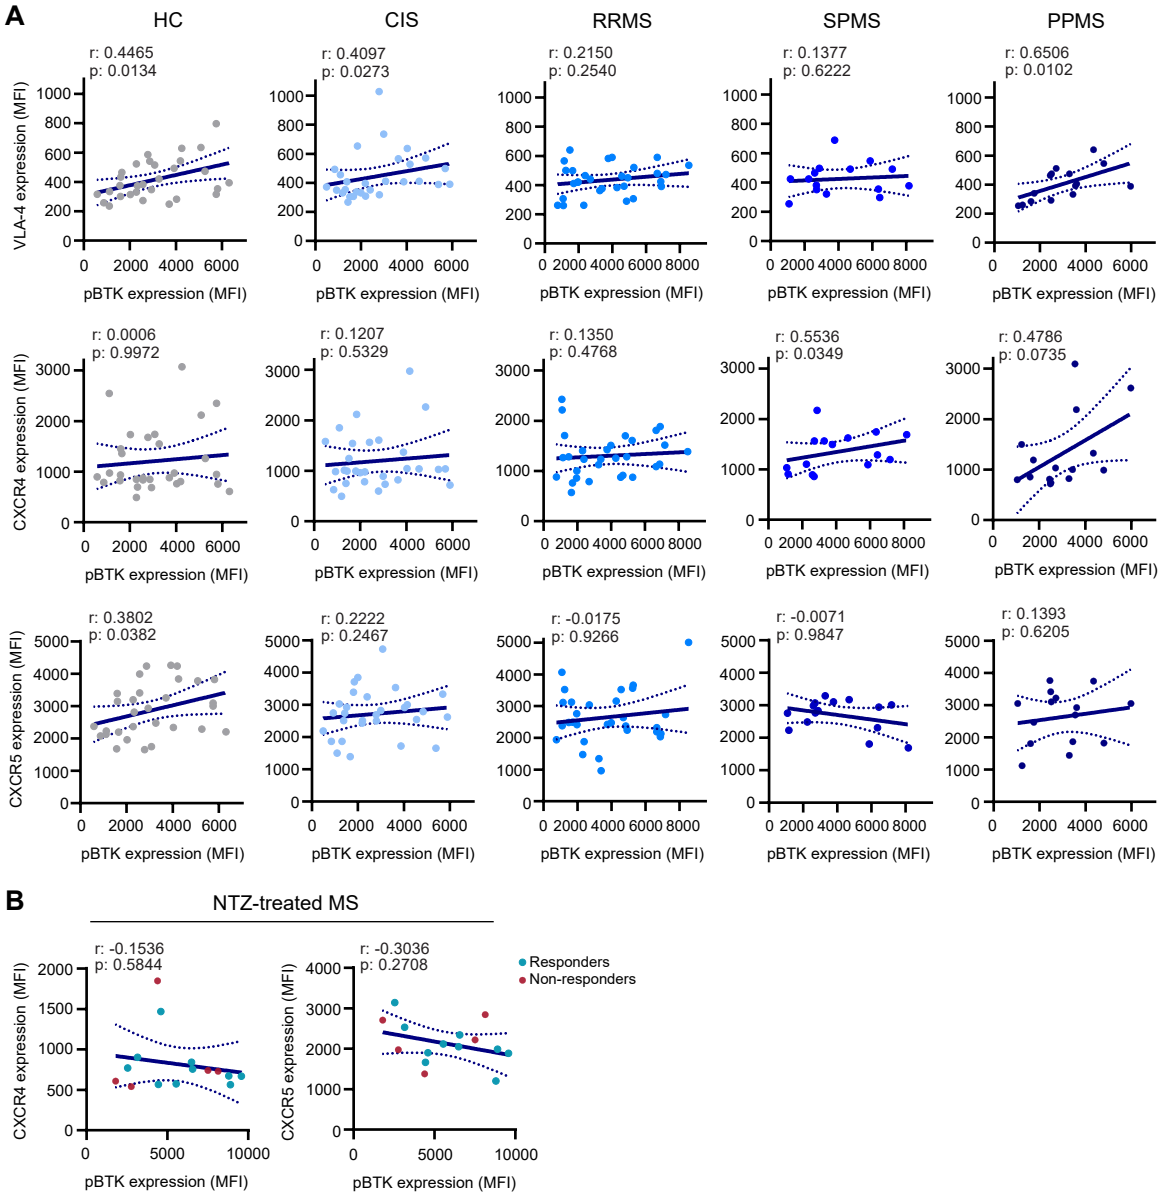

**Supplementary Figure 4. The association of basal BTK activity with VLA-4, CXCR4 and CXCR5 expression in B cells of MS patients. (A)** Correlation of BTK phosphorylation with VLA-4, CXCR4 and CXCR5 expression in circulating B cells of healthy control (HC; n=30), clinically isolated (CIS; n=29), relapsing-remitting MS (RRMS; n=30) secondary progressive MS (SPMS; n=15) and primary progressive MS (PPMS; n=15) patient groups. **(B)** Correlation of BTK phosphorylation with CXCR4 and CXCR5 expression in circulating B cells from MS patients treated with natalizumab (NTZ; n=15). Data were collected from the same number of experiments as depicted in Figures 1 and 2. Spearman correlations were performed.

Supplementary Figure 5

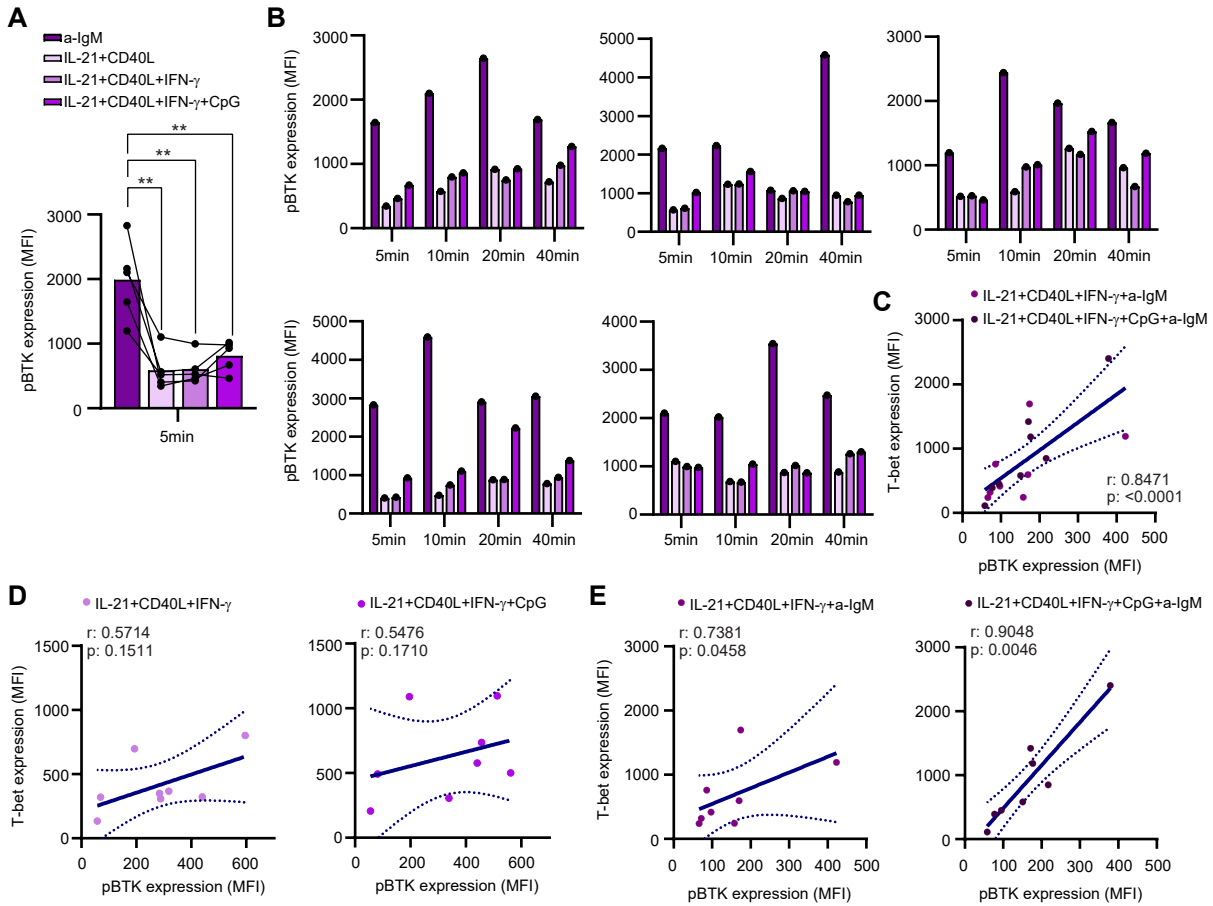

**Supplementary Figure 5. The impact of anti-IgM on phospho-BTK levels during short-term stimulations.** (A) Phospho-BTK induction in blood B cells from 5 healthy donors under anti-IgM- or IL-21/CD40L-inducing conditions with and without IFN- $\gamma$  or CpG for 5 min. (B) Donor-specific phospho-BTK induction under the same conditions for 5, 10, 20 and 40 min. (C) Correlation between T-bet and phospho-BTK levels in total B cells from 8 healthy blood donors after 48 h stimulation with anti-IgM, IL-21, CD40L and IFN- $\gamma$  with and without CpG. (D-E) Split correlations between T-bet and phospho-BTK levels in B cells under IL-21/CD40L/IFN- $\gamma$ -inducing conditions with and without CpG as well as with and without anti-IgM. FACS data were collected from the same number of experiments as depicted in Figure 3. RM one-way ANOVA with Fisher's LSD post-hoc test (A) as well as Spearman correlations (C-E) were performed. \*\* $p < 0.01$ .

Supplementary Figure 6

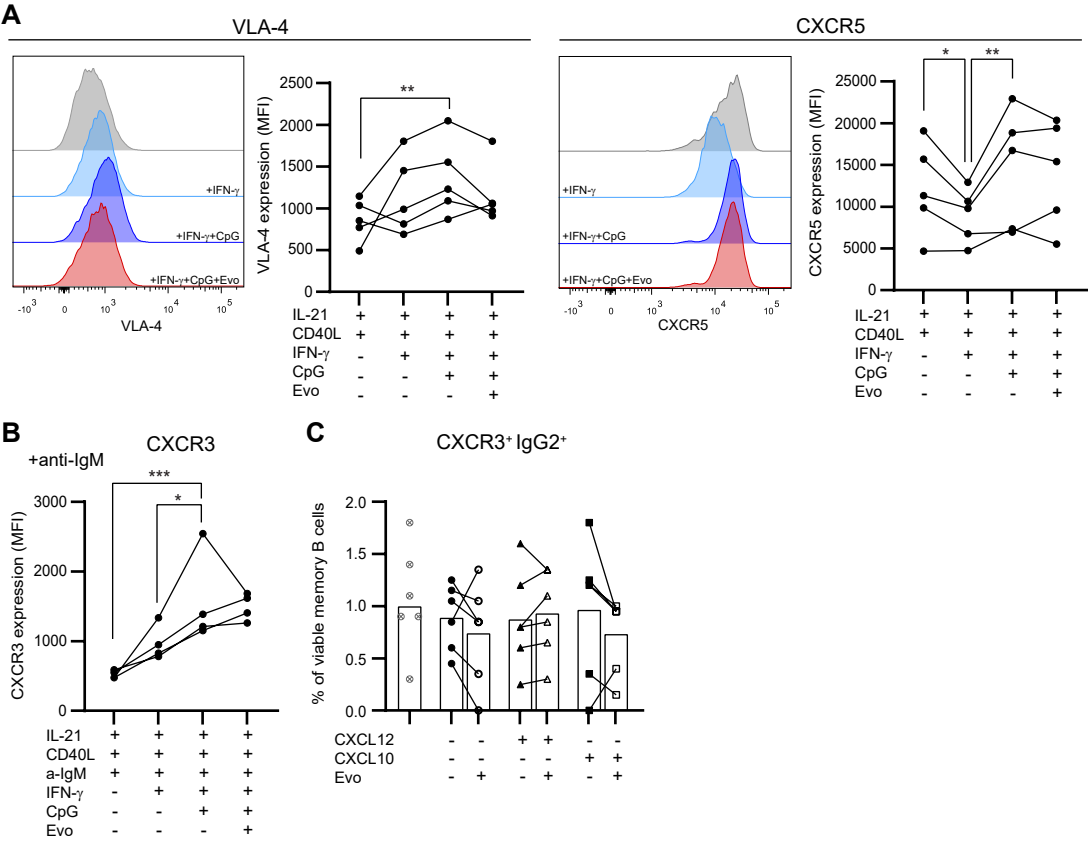

**Supplementary Figure 6. *In vitro* effects of evobrutinib on VLA-4 and CXCR5 expression during B-cell stimulations and the transmigration of CXCR3<sup>+</sup>IgG2<sup>+</sup> B cells.** (A) Histogram overlays and quantification of the MFI of VLA-4 and CXCR5 for B cells from the blood of 5 healthy donors after 48 h stimulations with IL-21, CD40L, IFN- $\gamma$  and CpG in the presence or absence of evobrutinib. (B) CXCR3 expression by healthy blood B cells under the same stimulating conditions with the addition of anti-IgM. (C) Percentages of viable CXCR3<sup>+</sup>IgG2<sup>+</sup> B cells before and after migration to medium, CXCL12 and CXCL10 through monolayers of human brain endothelial cells (n=6). FACS data were collected from the same number of experiments as depicted in Figures 3 and 5. RM one-way ANOVA with Fisher's LSD post-hoc test was performed. \*\*\*p < 0.001, \*\*p < 0.01 and \*p < 0.05.



Supplementary Figure 7

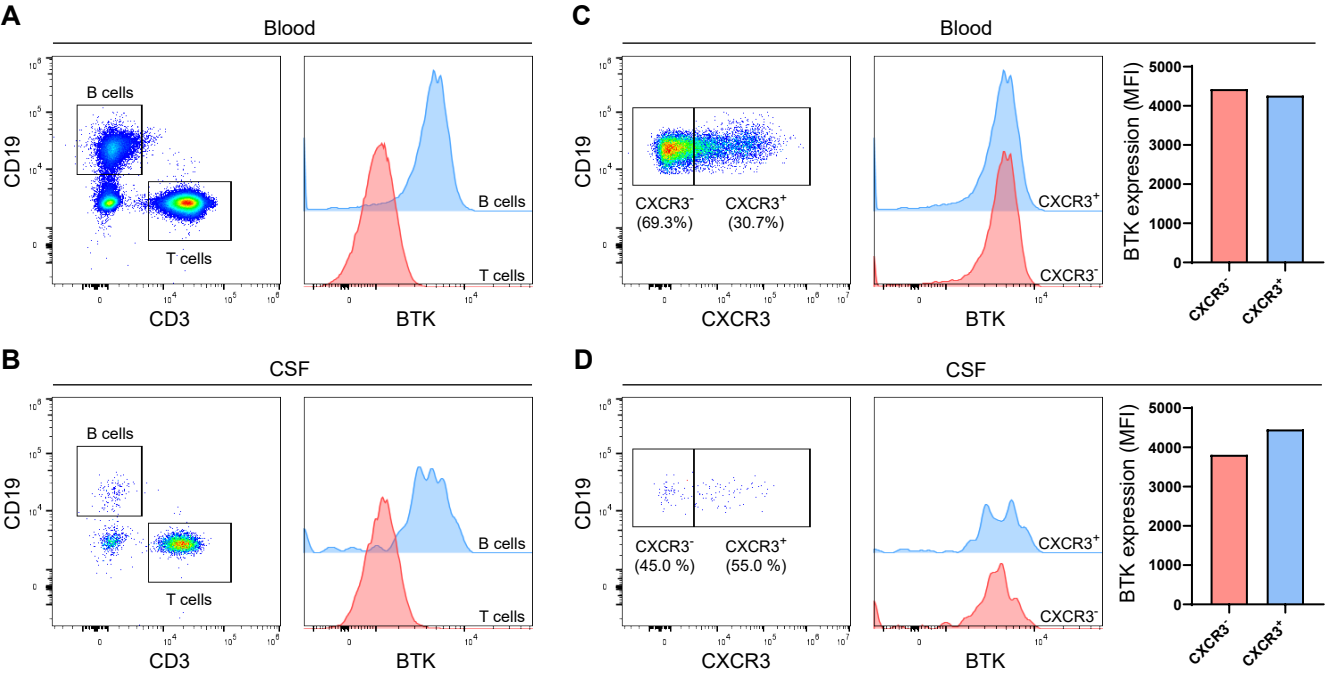

**Supplementary Figure 7. BTK expression within CXCR3<sup>-</sup> and CXCR3<sup>+</sup> B cells from blood and CSF of an MS patient.** FACS dot plots for identifying B and T cells within viable lymphocytes and histograms with total BTK expression levels within these cell populations in blood (**A**) and CSF (**B**) from an MS patient. FACS dot plots for identifying CXCR3<sup>-</sup> and CXCR3<sup>+</sup> B cells and histograms and bar charts with total BTK expression levels (MFI) within these cell populations in blood (**C**) and CSF (**D**) from an MS patient.
